# Supplementary material for: From Global to Local—New Insights into Features of Pyrethroid Detoxification in Vector Mosquitoes
Source: PubMed Central journal article supplement (PMC8063960; doi:10.3390/insects12040276), 2021-03-24
Supplement: insects-12-00276-s001.pdf [file insects-12-00276-s001.pdf]

**Table S1** *Anopheles* Resistance Genes

**Metabolic resistance**

| Species               | gene                                                             | Reference PMID                                                                                                                                     | Pyrethroid                                                     |
|-----------------------|------------------------------------------------------------------|----------------------------------------------------------------------------------------------------------------------------------------------------|----------------------------------------------------------------|
| <i>Anopheles</i> spp. |                                                                  |                                                                                                                                                    |                                                                |
| <i>An. albimanus</i>  | CYP4C26[131]                                                     | 30699158                                                                                                                                           | alpha-cypermethrin<br>deltamethrin                             |
|                       | CYP9K1[131]                                                      |                                                                                                                                                    |                                                                |
|                       | CYP6P5[131]                                                      |                                                                                                                                                    |                                                                |
| <i>An. arabiensis</i> | GSTe4 [15],<br>CYP6M2 [15], CYP6P3[15]                           | 24886129                                                                                                                                           | NA                                                             |
|                       | CYP4G16[132]                                                     | 24314005                                                                                                                                           | lambda-cyhalothrin                                             |
|                       | CYP6P4[133]                                                      | 23299100                                                                                                                                           | permethrin<br>deltamethrin                                     |
|                       | CYP9L1[134]                                                      | 22676389                                                                                                                                           | permethrin<br>deltamethrin                                     |
|                       | CYP, general[135, 136]                                           | 31796068; 31126311                                                                                                                                 | permethrin<br>deltamethrin<br>α-cypermethrin                   |
| <i>An. coluzzi</i>    | CYP6Z1[137]                                                      | 29618373                                                                                                                                           | permethrin                                                     |
|                       | CYP9K1[56, 137]                                                  | 29674455; 29618373                                                                                                                                 | permethrin<br>deltamethrin                                     |
|                       | CYP, general[81, 138-140]                                        | 30402485; 2753112<br>25333491; 32331386                                                                                                            | permethrin<br>deltamethrin                                     |
| <i>An. funestus</i>   | CYP6M7[62, 124, 141-144]                                         | 27628765; 29115954;<br>28003461; 27519696;<br>25261072; 22948188                                                                                   | permethrin<br>deltamethrin                                     |
|                       | CYP6P9a/b[16, 62, 64, 69,<br>70, 83, 124, 141, 143, 145-<br>149] | 30458849; 28428243;<br>27628765; 26370361;<br>22110757; 31604938;<br>30923819; 29115954;<br>28003461; 27135886;<br>25261072; 23248325;<br>20686697 | permethrin<br>deltamethrin<br>lambda-cyhalothrin<br>bifenthrin |
|                       | CYP6Z1[142, 146]                                                 | 27135886; 22948188                                                                                                                                 | permethrin<br>deltamethrin                                     |
|                       |                                                                  |                                                                                                                                                    |                                                                |

|                    |                                        |                                                                               |                                                                    |
|--------------------|----------------------------------------|-------------------------------------------------------------------------------|--------------------------------------------------------------------|
|                    | CYP6Z3[142]                            | 22948188                                                                      | NA                                                                 |
|                    | GST[81, 147]                           | 20686697; 32331386                                                            | permethrin                                                         |
|                    | GSTd1-5[83], GSTD3[83]                 | 30458849                                                                      | permethrin                                                         |
|                    | GSTe2[16, 83, 124, 138, 142, 148, 150] | 27628765; 27531125;<br>26370361; 30458849;<br>30433868; 28428243;<br>22948188 | permethrin<br>deltamethrin<br>lambda-cyhalothrin                   |
|                    | Alpha-esterases[140]                   | 30402485                                                                      | permethrin<br>deltamethrin                                         |
| <i>An. gambiae</i> | CYP, general[55, 151]                  | 23189131                                                                      | permethrin<br>deltamethrin                                         |
|                    | CYP4G16[22, 59, 152]                   | 32156617; 31554225;<br>28894186                                               | permethrin<br>deltamethrin<br>etofenprox                           |
|                    | CYP6M2[22, 46, 59, 143, 153-156]       | 31315630; 31554225;<br>29587635; 29115954;<br>28894186; 24651294;<br>21324359 | permethrin<br>deltamethrin<br>etofenprox<br>$\alpha$ -cypermethrin |
|                    | CYP6P1[143]                            | 29115954                                                                      | deltamethrin                                                       |
|                    | CYP6P3[157]                            | 28894186; 24651294;<br>23380570                                               | permethrin<br>deltamethrin<br>lambda-cyhalothrin<br>etofenprox     |
|                    | CYP6P4[20, 59]                         | 31554225; 30740870                                                            | permethrin<br>deltamethrin                                         |
|                    | CYP6P9a[57, 60]                        | 30894503; 28151952                                                            | NA                                                                 |
|                    | CYP6Z1[59, 146, 152]                   | 32156617; 31554225;<br>27135886                                               | permethrin<br>deltamethrin                                         |
|                    | CYP6Z2[157]                            | 23380570                                                                      | permethrin<br>deltamethrin<br>lambda-cyhalothrin                   |
|                    | CCYP9K1[59]                            | 31554225                                                                      | permethrin<br>deltamethrin                                         |
|                    | GSTd3[20, 153, 155]                    | 31315630; 30740870;<br>29587635                                               | permethrin<br>deltamethrin<br>$\alpha$ -cypermethrin               |

|                                     |                                                                                      |                                                                              |                                                                                          |
|-------------------------------------|--------------------------------------------------------------------------------------|------------------------------------------------------------------------------|------------------------------------------------------------------------------------------|
|                                     | GSTe2[22, 143]                                                                       | 28894186; 29115954                                                           | permethrin<br>deltamethrin<br>etofenprox                                                 |
|                                     | GST[151, 158-160]                                                                    | 24358177; 23641777;<br>23189131; 22472088                                    | permethrin<br>deltamethrin<br>etofenprox<br>$\alpha$ -cypermethrin<br>lambda-cyhalothrin |
|                                     | GSTS1-2[143]                                                                         | 29115954                                                                     | deltamethrin                                                                             |
|                                     | Mixed function<br>oxidases[158-160]                                                  | 24358177; 23641777;<br>22472088                                              | permethrin<br>deltamethrin<br>etofenprox<br>$\alpha$ -cypermethrin                       |
|                                     | esterases[151, 158-160]                                                              | 24358177; 23641777;<br>23189131; 22472088                                    | permethrin<br>deltamethrin<br>etofenprox<br>$\alpha$ -cypermethrin<br>lambda-cyhalothrin |
| <i>An. stephensi</i>                | GST[161, 162]                                                                        | 30584554; 24947216                                                           | cyfluthrin<br>alphamethrin<br>benfluthrin                                                |
|                                     | Alpha-esterases[161]                                                                 | 30584554                                                                     | cyfluthrin                                                                               |
| <i>An. sinensis</i>                 | CYP[163, 164], GST[163,<br>164]                                                      | 25499700; 23405157                                                           | deltamethrin                                                                             |
|                                     | CYP6Z2[165],<br>CYP6P3v1[165],<br>CYP6P3v2[165],<br>CYP9J5[165] and<br>CYP306A1[165] | 29393554                                                                     | NA                                                                                       |
| <i>Anopheles, mixed<br/>species</i> | GST, general[84, 97, 166-<br>170]                                                    | 30509288; 29566682<br>29310704; 27030033;<br>26296644; 25213601;<br>27378358 | permethrin<br>deltamethrin<br>etofenprox<br>$\alpha$ -cypermethrin<br>lambda-cyhalothrin |
|                                     | esterase[169, 170]                                                                   | 26296644; 27378358                                                           | deltamethrin<br>lambda-cyhalothrin                                                       |
|                                     | CYP, general[59, 168]                                                                | 27030033; 31554225                                                           | permethrin<br>deltamethrin                                                               |

|                              |          |                                                                            |
|------------------------------|----------|----------------------------------------------------------------------------|
| CYP6P3[170]                  | 27378358 | deltamethrin                                                               |
| CYP6M2[170]                  | 27378358 | deltamethrin                                                               |
| GSTD3[170]                   | 27378358 | deltamethrin                                                               |
| Mixed-function oxidases[167] | 29310704 | permethrin<br>deltamethrin<br>$\alpha$ -cypermethrin<br>lambda-cyhalothrin |

Table S2 *Aedes* and *Culex* Resistance Genes

| Species                       | Metabolic resistance gene                                                                                                                                    | Reference PMID                                   | Pyrethroid   |
|-------------------------------|--------------------------------------------------------------------------------------------------------------------------------------------------------------|--------------------------------------------------|--------------|
| <i>Culex</i> spp.             |                                                                                                                                                              |                                                  |              |
| <i>Culex pipiens</i>          | CYP9M10[171]                                                                                                                                                 | 25987223                                         | See review   |
| <i>Culex pipiens pipiens</i>  | CYP[172]                                                                                                                                                     | 30766584                                         | deltamethrin |
| <i>Culex pipiens pallens</i>  | CYP314A1[111]                                                                                                                                                | 29966536                                         | deltamethrin |
|                               | CYP6AA9[173, 174]                                                                                                                                            | 26377942; 25880395                               | deltamethrin |
|                               | CYP9AL1[175]                                                                                                                                                 | 30904950                                         | deltamethrin |
|                               | CYP9M10[176], Gstd1[176], Gstd2[176]                                                                                                                         | 29107250                                         | cypermethrin |
| <i>Culex quinquefasciatus</i> | CYP9M10[14, 75, 76, 177, 178]                                                                                                                                | 27095599; 23632895; 24155662; 21858101; 21540111 | permethrin   |
|                               | CYP325K3v1[178], CYP4D42v2, CYP9J45, CYP325G4, CYP4C38, CYP4H40; CYP6Z12, CYP9J33, CYP9J43, CYP9J34, CYP306A1, CYP6Z15, CYP9J45, CYPPAL1, CYP4C52v1, CYP9J39 | 24155662                                         | permethrin   |
|                               | CYP6AA7[76], CYP9J40, CYP9J34                                                                                                                                | 21858101                                         | permethrin   |

|                      |                                             |                                                                                          |                                                                                                                                   |
|----------------------|---------------------------------------------|------------------------------------------------------------------------------------------|-----------------------------------------------------------------------------------------------------------------------------------|
| <i>Aedes aegypti</i> | ABCB4[102]                                  | 22720108                                                                                 | NA                                                                                                                                |
|                      | GST, general[8, 25, 51, 179-184]            | 30552882; 26307496; 25454522; 21272394; 21394876; 21226942; 19556575; 29432488; 24299217 | deltamethrin<br>permethrin<br>λ-cyhalothrin<br>cypermethrin<br>cyfluthrin                                                         |
|                      | Carboxylesterase (COE)[8, 17, 31, 185, 186] | 28187780; 30758862; 28114328; 26588076; 24299217                                         | deltamethrin<br>permethrin                                                                                                        |
|                      | GST[8, 31, 185, 187]                        | 30758862; 31175834; 28114328; 24299217                                                   | permethrin<br>deltamethrin<br>cypermethrin                                                                                        |
|                      | GSTe2[186]                                  | 28187780                                                                                 | deltamethrin                                                                                                                      |
|                      | CYP[32, 74, 102, 188, 189]                  | 31519246; 30758862; 24299217; 24593293; 22720108                                         | permethrin<br>deltamethrin<br>(1R)-trans-fenfluthrin<br>etofenprox<br>cyfluthrin<br>bioallethrin<br>cypermethrin<br>fenpropathrin |
|                      | CYP4C50[71]                                 | 30452436                                                                                 | permethrin                                                                                                                        |
|                      | CYP6BB2                                     | 28187780; 30452436; 26588076; 24945250                                                   | deltamethrin<br>permethrin                                                                                                        |
|                      | CYP6CB1[185]                                | 28114328                                                                                 | NA                                                                                                                                |
|                      | CYP6F2/3[71]                                | 30452436                                                                                 | permethrin                                                                                                                        |
|                      | CYP6M11[17, 186]                            | 28187780; 26588076                                                                       | deltamethrin                                                                                                                      |
|                      | CYP6N12[17]                                 | 26588076                                                                                 | deltamethrin                                                                                                                      |
|                      | CYP6Z8[71]                                  | 30452436                                                                                 | permethrin                                                                                                                        |

|                       |                                              |                                        |                                                                                    |
|-----------------------|----------------------------------------------|----------------------------------------|------------------------------------------------------------------------------------|
|                       | CYP9J9[17]                                   | 26588076                               | deltamethrin                                                                       |
|                       | CYP9J10[17, 190]                             | 31027587; 26588076                     | deltamethrin                                                                       |
|                       | CYP9J19[190]                                 | 31027587                               | deltamethrin                                                                       |
|                       | CYP9J23[186]                                 | 28187780                               | deltamethrin                                                                       |
|                       | CYP9J26[102, 185]                            | 28114328; 22720108                     | NA                                                                                 |
|                       | CYP9J27[185]                                 | 28114328                               | NA                                                                                 |
|                       | CYP9J28[190]                                 | 31027587; 28347352                     | deltamethrin                                                                       |
|                       | CYP9J32[13]                                  | 21324051                               | deltamethrin                                                                       |
|                       | CYP9M4[185]                                  | 28114328                               | NA                                                                                 |
|                       | CYP9M5[71]                                   | 30452436                               | permethrin                                                                         |
|                       | CYP9M6[19, 71]                               | 30452436; 24945250                     | permethrin                                                                         |
|                       | Alpha- and beta-esterases[25, 179, 182, 191] | 26307496; 25454522; 23540124; 21272394 | deltamethrin<br>permethrin<br>$\lambda$ -cyhalothrin<br>cypermethrin<br>cyfluthrin |
|                       | Esterases[51, 180, 183, 184]                 | 21394876; 21226942; 19556575; 29432488 | Permethrin<br>deltamethrin<br>$\lambda$ -cyhalothrin<br>cypermethrin               |
|                       | Mixed function oxidases[25, 179, 182]        | 26307496; 25454522; 21272394           | deltamethrin<br>permethrin<br>$\lambda$ -cyhalothrin<br>cypermethrin<br>cyfluthrin |
| <i>Ae. albopictus</i> | GST, general[181, 192, 193]                  | 29298700; 30418967                     | deltamethrin                                                                       |
|                       | GSTS1/3[194]                                 | 27094778                               | permethrin                                                                         |
|                       | CYP, general[181, 193]                       | 29298700; 30418967                     | deltamethrin                                                                       |

---

|                   |          |              |
|-------------------|----------|--------------|
| CYP6A8[193]       | 30418967 | deltamethrin |
| CYP6P12[194]      | 27094778 | permethrin   |
| esterase[193]     | 30418967 | deltamethrin |
| COE, general[192] | 29298700 | deltamethrin |
